# Supplementary material
Source: publisher site journal article supplement (https://www.dovepress.com/article/570759)
Supplement: Supplementary file 1 [file 570759%20Revised%20Supplementary%20Material.docx]

Supplementary Materials

**Correlation between subepithelial fibrosis and vitamin D deficiency in chronic rhinosinusitis with nasal polyps: Insights from Histological and Transcriptomic Analyses**

Table S1. Multinomial logistic regression analysis of factors associated with subepithelial fibrosis severity

Table S2. Sensitivity analysis excluding participants aged <18 years: multivariable multinomial logistic regression for subepithelial fibrosis severity

Table S3. Association Between Vitamin D Deficiency and Subepithelial Fibrosis in Non-smoking Patients with Nasal Polyps: A Multivariable Analysis

Table S4. Multivariable logistic regression evaluating the impact of fibrosis on disease outcomes

Table S5. The correlation of serum vitamin D levels and multiple inflammatory biomarker

Table S6. GO enrichment analysis for up-regulated genes in the vitamin D deficient group compared to non-deficient group.

Table S7. GO enrichment analysis for down-regulated genes in the vitamin D deficient group compared to non-deficient group.

Table S8. KEGG enrichment analysis for up-regulated genes in the vitamin D deficient group compared to non-deficient group.

Table S9. KEGG enrichment analysis for down-regulated genes in the vitamin D deficient group compared to non-deficient group.

**Table S1. Multinomial logistic regression analysis of factors associated with subepithelial fibrosis severity**

| Factors | Mild fibrosis*a* | | Moderate–severe fibrosis*a* | |
| --- | --- | --- | --- | --- |
| OR (95% CI) | 1. *values* | OR (95% CI) | *P-values* |
| Age | 1.04 (0.98–1.10) | 0.241 | 1.00 (0.93–1.06) | 0.875 |
| Vitamin D status |  |  |  |  |
| Sufficient | Ref |  | Ref |  |
| Insufficient | 3.20 (0.64–15.91) | 0.156 | 1.22 (0.24–6.14) | 0.812 |
| Deficiency | **28.75 (2.22–372.29)** | **0.01** | 4.63 (0.35–62.04) | 0.247 |
| Gender |  |  |  |  |
| Female | Ref |  | Ref |  |
| Male | 0.640 (0.092-4.464) | 0.652 | 0.40 (0.05–3.02) | 0.371 |
| Season |  |  |  |  |
| Winter | Ref |  | Ref |  |
| Spring | 0.45 (0.04–5.31) | 0.522 | 0.61 (0.05–8.07) | 0.705 |
| Summer | 0.13 (0.01–1.50) | 0.101 | 0.14 (0.01–1.90) | 0.138 |
| Autumn | 1.11 (0.08–15.33) | 0.938 | 1.11 (0.07–17.43) | 0.944 |
| Smoke |  |  |  |  |
| Yes | Ref |  | Ref |  |
| No | 0.41 (0.08–25.20) | 0.814 | 0.29 (0.02–4.27) | 0.368 |
| Allergic rhinitis |  |  |  |  |
| Yes | Ref |  | Ref |  |
| No | 0.90 (0.20–4.03) | 0.887 | 0.90 (0.18–4.50) | 0.9 |
| Prior ESS |  |  |  |  |
| Yes | Ref |  | Ref |  |
| No | 0.35 (0.03–4.11) | 0.403 | 1.52 (0.05–42.94) | 0.805 |

Abbreviations: OR, Odds Ratio; 95% CI, 95% Confidence Interval; ESS, Endoscopic Sinus Surgery; Ref, reference category；

aThe reference category is non-fibrosis.

****Table S2. Sensitivity analysis excluding participants aged <18 years: multivariable multinomial logistic regression for subepithelial fibrosis severity****

| Factors | Mild fibrosis*a* | | Moderate–severe fibrosis*a* | |
| --- | --- | --- | --- | --- |
| OR (95% CI) | *P-values* | OR (95% CI) | *P-values* |
| Age | 1.04 (0.98–1.11) | 0.199 | 1.00 (0.93–1.06) | 0.893 |
| Vitamin D status |  |  |  |  |
| Sufficient | Ref |  | Ref |  |
| Insufficient | 3.34 (0.66–16.93) | 0.146 | 1.23 (0.24–6.20) | 0.801 |
| Deficiency | **25.04 (1.99–315.34)** | **0.013** | 4.12 (0.32–53.53) | 0.279 |
| Gender |  |  |  |  |
| Female | Ref |  | Ref |  |
| Male | 0.57 (0.08–4.08) | 0.576 | 0.38 (0.05–2.99) | 0.36 |
| Season |  |  |  |  |
| Winter | Ref |  | Ref |  |
| Spring | 0.44 (0.04–5.27) | 0.52 | 0.61 (0.05–8.07) | 0.707 |
| Summer | 0.12 (0.01–1.37) | 0.088 | 0.14 (0.01–1.96) | 0.144 |
| Autumn | 1.09 (0.08–15.02) | 0.947 | 1.10 (0.07–17.31) | 0.945 |
| Smoke |  |  |  |  |
| Yes | Ref |  | Ref |  |
| No | 0.37 (0.08–24.29) | 0.831 | 0.29 (0.02–4.27) | 0.37 |
| Allergic rhinitis |  |  |  |  |
| Yes | Ref |  | Ref |  |
| No | 0.97 (0.22–4.40) | 0.973 | 0.91 (0.18–4.53) | 0.91 |
| Prior ESS |  |  |  |  |
| Yes | Ref |  | Ref |  |
| No | 0.33 (0.03–3.88) | 0.374 | 1.53 (0.05–43.58) | 0.805 |

Abbreviations: OR, Odds Ratio; 95% CI, 95% Confidence Interval; Ref, reference category；ESS, Endoscopic Sinus Surgery;

aThe reference category is non-fibrosis.

**Table S3. Association Between Vitamin D Deficiency and Subepithelial Fibrosis in Non-smoking Patients with Nasal Polyps: A Multivariable Analysis**

| Factors | Mild fibrosis*a* | | Moderate–severe fibrosis*a* | |
| --- | --- | --- | --- | --- |
| OR (95% CI) | *P-values* | OR (95% CI) | *P-values* |
| Age | 1.04 (0.98–1.10) | 0.202 | 1.00 (0.94–1.07) | 0.958 |
| Vitamin D status |  |  |  |  |
| Sufficient | Ref |  | Ref |  |
| Insufficient | 3.33 (0.68–16.43) | 0.139 | 1.10 (0.23–5.39) | 0.905 |
| Deficiency | **30.56 (2.34–399.85)** | **0.009** | 4.74 (0.36–62.65) | 0.237 |
| Gender |  |  |  |  |
| Female | Ref |  | Ref |  |
| Male | 0.64 (0.09–4.35) | 0.644 | 0.46 (0.06–3.43) | 0.451 |
| Season |  |  |  |  |
| Winter | Ref |  | Ref |  |
| Spring | 0.39 (0.03–4.62) | 0.457 | 0.69 (0.05–8.98) | 0.778 |
| Summer | 0.12 (0.01–1.45) | 0.095 | 0.13 (0.01–1.86) | 0.134 |
| Autumn | 1.06 (0.08–14.62) | 0.967 | 1.00 (0.06–15.62) | 1 |
| Allergic rhinitis |  |  |  |  |
| Yes | Ref |  | Ref |  |
| No | 0.89 (0.20–3.96) | 0.879 | 0.83 (0.17–4.04) | 0.815 |
| Prior ESS |  |  |  |  |
| Yes | Ref |  | Ref |  |
| No | 0.35 (0.03–3.99) | 0.395 | 1.84 (0.07–49.72) | 0.716 |

Abbreviations: OR, Odds Ratio; 95% CI, 95% Confidence Interval; ESS, Endoscopic Sinus Surgery; Ref, reference category；

aThe reference category is non-fibrosis.

**Table S4. Multivariable logistic regression evaluating the impact of fibrosis on disease outcomes**

| Factors | | Partially Controlled*a* | | Completely Controlled*a* | |
| --- | --- | --- | --- | --- | --- |
| OR (95% CI) | *P-values* | OR (95% CI) | *P-values* |
| Demographics | |  |  |  |  |
| Age | | 0.92 (0.79–1.07) | 0.289 | 0.92 (0.78–1.08) | 0.314 |
| Gender | |  |  |  |  |
| Female | | Ref |  | Ref |  |
| Male | | 1.02 (0.04–28.13) | 0.993 | 2.01 (0.05–80.42) | 0.711 |
| Clinical Assessment | |  |  |  |  |
| TNSS | | **0.12 (0.03–0.562)** | **0.007** | **0.03 (0.01–0.17)** | **<0.001** |
| LM Score | | **0.6 (0.38–0.96)** | **0.031** | **0.63 (0.38–1.02)** | 0.06 |
| LK Score | | 0.98(0.44–2.21) | 0.968 | 0.66 (0.27–1.62) | 0.361 |
| Laboratory & Pathology | |  |  |  |  |
| Blood EOS count，(×109/L) | | 1.87 (0.84–4.21) | 0.128 | 1.37 (0.66–2.84) | 0.396 |
| Tissue EOS count，(×109/L) | | 1.15 (0.93–1.42) | 0.203 | 1.01 (0.77–1.32) | 0.942 |
| Tissue neutrophil count，(/HPF) | | 0.97 (0.92–1.02) | 0.282 | 1.01 (0.94–1.08) | 0.793 |
| Vitamin D status | |  |  |  |  |
| Sufficient | | Ref |  | Ref |  |
| Insufficiency | | 0.05 (0.00–5.24) | 0.202 | 0.08 (0.00–12.77) | 0.328 |
| Deficiency | | 0.01 (0.00–2.35) | 0.101 | 0.04 (0.00–11.64) | 0.265 |
| Fibrosis | |  |  |  |  |
| Severe | | Ref |  | Ref |  |
| Mild | | 15.35 (0.29–804.46) | 0.176 | 10.82 (0.15–757.66) | 0.272 |
| None | | 0.93 (0.01–167.25) | 0.978 | 3.24 (0.01–1026.70) | 0.689 |
| Medical History | |  |  |  |  |
| Previous ESS | |  |  |  |  |
| Yes | | Ref |  | Ref |  |
| No | | 0.999 (0.012–84.40) | 1 | 0.346 (0.002–66.42) | 0.692 |
| Smoking History |  | |  |  |  |
| Yes | Ref | |  | Ref |  |
| No | 0.392 (0.008–18.30) | | 0.633 | 0.415 (0.011–179.0) | 0.888 |
| Allergic Rhinitis |  | |  |  |  |
| Yes | Ref | |  | Ref |  |
| No | 81.84 (1.83–3652.9) | | 0.223 | 88.52 (1.53–5109.0) | 0.33 |

Abbreviations: OR, odds ratio; CI, confidence interval; TNSS, Total Nasal Symptom Score; LM, Lund-Mackay; LK, Lund-Kennedy; EOS, eosinophil; ESS, endoscopic sinus surgery.

aThe reference category is disease uncontrolled.

**Table S5. The correlation of serum vitamin D levels and multiple inflammatory biomarker**

| Inflammatory biomarker | Spearman’s ρ | P-values |
| --- | --- | --- |
| Blood eosinophil count, (×109/L) | -0.064 | 0.525 |
| Tissue eosinophil count, (/HPF) | -0.084 | 0.406 |
| Blood neutrophil count, (×109/L) | -0.037 | 0.716 |
| Tissue neutrophil counts, (/HPF) | -0.055 | 0.588 |

Abbreviations: HPF, high-power field; ρ, Spearman’s rank correlation coefficient.

Note: Spearman’s rank correlation was used to assess the association between serum vitamin D levels and inflammatory biomarkers.

**Table S6. GO enrichment analysis for up-regulated genes in the vitamin D deficient group compared to non-deficient group**

| **ONTOLOGY** | **ID** | **Description** | **p.adjust** |
| --- | --- | --- | --- |
| BP | GO:0031424 | keratinization | 0.000 |
| BP | GO:0008544 | epidermis development | 0.000 |
| BP | GO:0043588 | skin development | 0.000 |
| BP | GO:0030198 | extracellular matrix organization | 0.000 |
| BP | GO:0043062 | extracellular structure organization | 0.000 |
| BP | GO:0045229 | external encapsulating structure organization | 0.000 |
| BP | GO:0030216 | keratinocyte differentiation | 0.000 |
| BP | GO:0009913 | epidermal cell differentiation | 0.001 |
| BP | GO:0048661 | positive regulation of smooth muscle cell proliferation | 0.011 |
| BP | GO:0045109 | intermediate filament organization | 0.015 |
| BP | GO:0002920 | regulation of humoral immune response | 0.017 |
| BP | GO:0044344 | cellular response to fibroblast growth factor stimulus | 0.017 |
| BP | GO:0008300 | isoprenoid catabolic process | 0.017 |
| BP | GO:0090287 | regulation of cellular response to growth factor stimulus | 0.017 |
| BP | GO:0006959 | humoral immune response | 0.019 |
| BP | GO:0002775 | antimicrobial peptide production | 0.019 |
| BP | GO:0071774 | response to fibroblast growth factor | 0.019 |
| BP | GO:0098773 | skin epidermis development | 0.019 |
| BP | GO:0001523 | retinoid metabolic process | 0.019 |
| BP | GO:0002686 | negative regulation of leukocyte migration | 0.020 |
| BP | GO:0002759 | regulation of antimicrobial humoral response | 0.020 |
| BP | GO:0016101 | diterpenoid metabolic process | 0.020 |
| BP | GO:0019730 | antimicrobial humoral response | 0.020 |
| BP | GO:0050673 | epithelial cell proliferation | 0.020 |
| BP | GO:0045104 | intermediate filament cytoskeleton organization | 0.022 |
| BP | GO:0045103 | intermediate filament-based process | 0.022 |
| BP | GO:0010810 | regulation of cell-substrate adhesion | 0.022 |
| BP | GO:0042573 | retinoic acid metabolic process | 0.022 |
| BP | GO:0010469 | regulation of signaling receptor activity | 0.022 |
| BP | GO:0050731 | positive regulation of peptidyl-tyrosine phosphorylation | 0.024 |
| BP | GO:0030212 | hyaluronan metabolic process | 0.024 |
| BP | GO:0051952 | regulation of amine transport | 0.024 |
| BP | GO:0006721 | terpenoid metabolic process | 0.025 |
| BP | GO:0040036 | regulation of fibroblast growth factor receptor signaling pathway | 0.031 |
| BP | GO:0097529 | myeloid leukocyte migration | 0.031 |
| BP | GO:0060078 | regulation of postsynaptic membrane potential | 0.033 |
| BP | GO:0050922 | negative regulation of chemotaxis | 0.033 |
| BP | GO:0015837 | amine transport | 0.033 |
| BP | GO:1904035 | regulation of epithelial cell apoptotic process | 0.035 |
| BP | GO:0031589 | cell-substrate adhesion | 0.035 |
| BP | GO:0050678 | regulation of epithelial cell proliferation | 0.035 |
| BP | GO:0045785 | positive regulation of cell adhesion | 0.035 |
| BP | GO:1904037 | positive regulation of epithelial cell apoptotic process | 0.036 |
| BP | GO:0050804 | modulation of chemical synaptic transmission | 0.036 |
| BP | GO:0097530 | granulocyte migration | 0.036 |
| BP | GO:0099177 | regulation of trans-synaptic signaling | 0.036 |
| BP | GO:0030510 | regulation of BMP signaling pathway | 0.044 |
| BP | GO:0072001 | renal system development | 0.044 |
| BP | GO:0006720 | isoprenoid metabolic process | 0.044 |
| BP | GO:2000273 | positive regulation of signaling receptor activity | 0.044 |
| BP | GO:0042220 | response to cocaine | 0.047 |
| BP | GO:0061844 | antimicrobial humoral immune response mediated by antimicrobial peptide | 0.049 |
| BP | GO:1900424 | regulation of defense response to bacterium | 0.050 |
| BP | GO:2001044 | regulation of integrin-mediated signaling pathway | 0.050 |
| BP | GO:0010811 | positive regulation of cell-substrate adhesion | 0.050 |
| BP | GO:0007611 | learning or memory | 0.050 |
| BP | GO:0002688 | regulation of leukocyte chemotaxis | 0.050 |
| BP | GO:0006022 | aminoglycan metabolic process | 0.050 |
| BP | GO:0090288 | negative regulation of cellular response to growth factor stimulus | 0.050 |
| BP | GO:0002689 | negative regulation of leukocyte chemotaxis | 0.050 |
| BP | GO:0032891 | negative regulation of organic acid transport | 0.050 |
| BP | GO:2000353 | positive regulation of endothelial cell apoptotic process | 0.050 |
| CC | GO:0062023 | collagen-containing extracellular matrix | 0.000 |
| CC | GO:0001533 | cornified envelope | 0.002 |
| CC | GO:0150034 | distal axon | 0.004 |
| CC | GO:0005604 | basement membrane | 0.007 |
| CC | GO:0042599 | lamellar body | 0.016 |
| CC | GO:0098637 | protein complex involved in cell-matrix adhesion | 0.016 |
| CC | GO:0005788 | endoplasmic reticulum lumen | 0.016 |
| CC | GO:0044853 | plasma membrane raft | 0.016 |
| CC | GO:0045121 | membrane raft | 0.016 |
| CC | GO:0098857 | membrane microdomain | 0.016 |
| CC | GO:0030426 | growth cone | 0.016 |
| CC | GO:0098644 | complex of collagen trimers | 0.016 |
| CC | GO:0097060 | synaptic membrane | 0.016 |
| CC | GO:0030427 | site of polarized growth | 0.016 |
| CC | GO:0099634 | postsynaptic specialization membrane | 0.018 |
| CC | GO:0045334 | clathrin-coated endocytic vesicle | 0.021 |
| CC | GO:0098636 | protein complex involved in cell adhesion | 0.023 |
| CC | GO:0009897 | external side of plasma membrane | 0.023 |
| CC | GO:0045095 | keratin filament | 0.023 |
| CC | GO:0098839 | postsynaptic density membrane | 0.027 |
| CC | GO:0045211 | postsynaptic membrane | 0.042 |
| CC | GO:0005614 | interstitial matrix | 0.043 |
| CC | GO:0030669 | clathrin-coated endocytic vesicle membrane | 0.043 |
| CC | GO:0043198 | dendritic shaft | 0.046 |
| CC | GO:0043197 | dendritic spine | 0.048 |
| CC | GO:0005775 | vacuolar lumen | 0.048 |
| CC | GO:0044309 | neuron spine | 0.049 |
| MF | GO:0005201 | extracellular matrix structural constituent | 0.000 |
| MF | GO:0005539 | glycosaminoglycan binding | 0.000 |
| MF | GO:0048018 | receptor ligand activity | 0.001 |
| MF | GO:0005125 | cytokine activity | 0.001 |
| MF | GO:0019838 | growth factor binding | 0.003 |
| MF | GO:0005540 | hyaluronic acid binding | 0.004 |
| MF | GO:0008201 | heparin binding | 0.010 |
| MF | GO:0019955 | cytokine binding | 0.011 |
| MF | GO:0030280 | structural constituent of skin epidermis | 0.014 |
| MF | GO:0140375 | immune receptor activity | 0.014 |
| MF | GO:0030297 | transmembrane receptor protein tyrosine kinase activator activity | 0.014 |
| MF | GO:0008237 | metallopeptidase activity | 0.018 |
| MF | GO:0004222 | metalloendopeptidase activity | 0.029 |
| MF | GO:0016903 | oxidoreductase activity, acting on the aldehyde or oxo group of donors | 0.029 |
| MF | GO:0017134 | fibroblast growth factor binding | 0.032 |
| MF | GO:0004896 | cytokine receptor activity | 0.042 |

**Table S7. GO enrichment analysis for down-regulated genes in the vitamin D deficient group compared to non-deficient group**

| **ONTOLOGY** | **ID** | **Description** | **p.adjust** |
| --- | --- | --- | --- |
| BP | GO:0035082 | axoneme assembly | 0.000 |
| BP | GO:0001578 | microtubule bundle formation | 0.000 |
| BP | GO:0003341 | cilium movement | 0.000 |
| BP | GO:0044782 | cilium organization | 0.000 |
| BP | GO:0060271 | cilium assembly | 0.000 |
| BP | GO:0070286 | axonemal dynein complex assembly | 0.001 |
| BP | GO:0007018 | microtubule-based movement | 0.001 |
| BP | GO:0044458 | motile cilium assembly | 0.007 |
| BP | GO:0060294 | cilium movement involved in cell motility | 0.016 |
| BP | GO:0001895 | retina homeostasis | 0.019 |
| BP | GO:0001539 | cilium or flagellum-dependent cell motility | 0.019 |
| BP | GO:0060285 | cilium-dependent cell motility | 0.019 |
| BP | GO:0007288 | sperm axoneme assembly | 0.019 |
| BP | GO:0070293 | renal absorption | 0.026 |
| BP | GO:0030317 | flagellated sperm motility | 0.029 |
| BP | GO:0097722 | sperm motility | 0.029 |
| BP | GO:1902476 | chloride transmembrane transport | 0.037 |
| BP | GO:0120316 | sperm flagellum assembly | 0.046 |
| BP | GO:0036159 | inner dynein arm assembly | 0.050 |
| CC | GO:0005930 | axoneme | 0.000 |
| CC | GO:0097014 | ciliary plasm | 0.000 |
| CC | GO:0032838 | plasma membrane bounded cell projection cytoplasm | 0.000 |
| CC | GO:0099568 | cytoplasmic region | 0.001 |
| CC | GO:0043204 | perikaryon | 0.012 |
| CC | GO:0031514 | motile cilium | 0.012 |
| CC | GO:0120293 | dynein axonemal particle | 0.036 |
| CC | GO:0005874 | microtubule | 0.036 |
| CC | GO:0005858 | axonemal dynein complex | 0.036 |
| CC | GO:0005865 | striated muscle thin filament | 0.036 |
| CC | GO:0036064 | ciliary basal body | 0.042 |
| CC | GO:0036379 | myofilament | 0.048 |
| CC | GO:0034707 | chloride channel complex | 0.048 |
| MF | GO:0005254 | chloride channel activity | 0.019 |
| MF | GO:0015267 | channel activity | 0.019 |
| MF | GO:0022803 | passive transmembrane transporter activity | 0.019 |
| MF | GO:0005253 | monoatomic anion channel activity | 0.027 |
| MF | GO:0015631 | tubulin binding | 0.038 |
| MF | GO:0005216 | monoatomic ion channel activity | 0.038 |
| MF | GO:0015108 | chloride transmembrane transporter activity | 0.046 |

**Table S8. KEGG enrichment analysis for up-regulated genes in the vitamin D deficient group compared to non-deficient group**

| **ID** | **Description** | **p.adjust** |
| --- | --- | --- |
| hsa00830 | Retinol metabolism | 0.001 |
| hsa04974 | Protein digestion and absorption | 0.004 |
| hsa00982 | Drug metabolism - cytochrome P450 | 0.004 |
| hsa04060 | Cytokine-cytokine receptor interaction | 0.007 |
| hsa00350 | Tyrosine metabolism | 0.014 |
| hsa04080 | Neuroactive ligand-receptor interaction | 0.025 |
| hsa00980 | Metabolism of xenobiotics by cytochrome P450 | 0.025 |
| hsa04512 | ECM-receptor interaction | 0.039 |
| hsa04640 | Hematopoietic cell lineage | 0.056 |

**Table S9. KEGG enrichment analysis for down-regulated genes in the vitamin D deficient group compared to non-deficient group**

| **ID** | **Description** | **p.adjust** |
| --- | --- | --- |
| hsa04512 | ECM-receptor interaction | 0.073 |
| hsa04966 | Collecting duct acid secretion | 0.073 |
| hsa04814 | Motor proteins | 0.156 |
| hsa04970 | Salivary secretion | 0.184 |
| hsa04977 | Vitamin digestion and absorption | 0.380 |
| hsa04024 | cAMP signaling pathway | 0.520 |
| hsa04145 | Phagosome | 0.520 |
| hsa05323 | Rheumatoid arthritis | 0.520 |
| hsa04657 | IL-17 signaling pathway | 0.520 |
| hsa05165 | Human papillomavirus infection | 0.535 |
